# Supplementary material
Source: PubMed Central journal article supplement (PMC1869047)
Supplement: NIHMS235-supplement-Supp_Table2.pdf [file NIHMS235-supplement-Supp_Table2.pdf]

**Supplementary Table 2.** List of differentially regulated proteins identified by the 2-DE-based approach after platelet activation with CRP (10 µg/ml, 90 sec).

| Protein Name                                                                          | AN <sup>a)</sup> | Mass, Da | pI   | Gel <sup>b)</sup> | Fold <sup>c)</sup> | Protein Function <sup>d)</sup>                                                                                                  |
|---------------------------------------------------------------------------------------|------------------|----------|------|-------------------|--------------------|---------------------------------------------------------------------------------------------------------------------------------|
| <b>Signaling proteins</b>                                                             |                  |          |      |                   |                    |                                                                                                                                 |
| PDZ and LIM domain protein 1 (LIM domain protein CLP-36)                              | O00151           | 35246    | 6.87 | 6-11              | B                  | Acts as an adapter that recruits proteins to the cytoskeleton.                                                                  |
|                                                                                       |                  | 13145    | 5.78 | 4-7               | B                  |                                                                                                                                 |
|                                                                                       |                  | 12417    | 6.29 | 4-7               | B                  |                                                                                                                                 |
|                                                                                       |                  | 12155    | 6.35 | 4-7               | B                  |                                                                                                                                 |
| ADAP [Adhesion- and degranulation-promoting adapter protein] (SLAP-130, FYB)          | O15117           | 16914    | 5.33 | 4-7               | B                  | Adapter protein with a SH3 domain. Tyrosine phosphorylated in activated platelets. Binds to SKAP-Hom and SLP-76.                |
| RGS10 [Regulator of G-protein signaling 10]                                           | O43665           | 21439    | 5.37 | 4-7               | 5.31               | Inhibits signal transduction by increasing the GTPase activity of G protein alpha subunits.                                     |
|                                                                                       |                  | 20366    | 5.64 | 4-7               | CRP                |                                                                                                                                 |
|                                                                                       |                  | 21205    | 5.64 | 4-7               | CRP                |                                                                                                                                 |
|                                                                                       |                  | 20160    | 6.88 | 6-11              | B                  |                                                                                                                                 |
| Dok-2 [Downstream of tyrosine kinases]                                                | O60496           | 51384    | 5.46 | 4-7               | B                  | Adapter downstream of tyrosine kinases. Constitutively tyrosine phosphorylated.                                                 |
| SKAP-HOM (SKAP55 HOMOLOGUE) [Src kinase-associated phosphoprotein 55-related protein] | O75563           | 36971    | 4.67 | 4-7               | B                  | Adapter protein. Contains one SH3 domain. Associated with SLAP-130 in platelets.                                                |
| Gads [Grb2-related adaptor protein 2]                                                 | O75791           | 39101    | 6.29 | 6-11              | B                  | Interacts with SLP-76 to regulate NF-AT activation. Binds to tyrosine-phosphorylated shc. Contains one SH2 and two SH3 domains. |
|                                                                                       |                  | 39305    | 5.92 | 6-11              | CRP                |                                                                                                                                 |

|                                                                                                        |                            |                                                                                                          |                                                                                              |                                                                                           |                                                                             |                                                                                                                       |
|--------------------------------------------------------------------------------------------------------|----------------------------|----------------------------------------------------------------------------------------------------------|----------------------------------------------------------------------------------------------|-------------------------------------------------------------------------------------------|-----------------------------------------------------------------------------|-----------------------------------------------------------------------------------------------------------------------|
| HLA class I histocompatibility antigen, A-2 alpha chain (Precursor)<br>Or<br>MHC class I HLA-A protein | P01892<br><br>Or<br>P79603 | 43090                                                                                                    | 5.99                                                                                         | 4-7                                                                                       | B                                                                           | Involved in the presentation of foreign antigens to the immune system. Type I membrane protein.                       |
| Heat shock 27 kDa protein                                                                              | P04792                     | 28188<br>27468<br>26798<br>26458                                                                         | 4.96<br>5.21<br>5.54<br>5.82                                                                 | 4-7<br>4-7<br>4-7<br>4-7                                                                  | CRP<br>2.81<br>B<br>-3.43                                                   | Substrate for p38 kinases. Involved in cytoskeletal regulation.                                                       |
| Pleckstrin                                                                                             | P08567                     | 43704<br>43465<br>42940<br>42892<br>42782<br>42782<br>42614<br>42495<br>42495<br>42495<br>42495<br>42377 | 5.93<br>5.81<br>6.34<br>7.04<br>7.09<br>7.21<br>6.12<br>6.86<br>6.65<br>6.73<br>7.15<br>6.88 | 4-7<br>4-7<br>4-7<br>6-11<br>6-11<br>6-11<br>6-11<br>6-11<br>6-11<br>6-11<br>6-11<br>6-11 | CRP<br>CRP<br>3.23<br>-2.22<br>B<br>B<br>-2.08<br>B<br>-2.97<br>B<br>B<br>B | Major protein kinase C substrate of platelets.                                                                        |
| c-Src                                                                                                  | P12931                     | 58294<br>56094<br>55544<br>55467<br>50832                                                                | 6.01<br>6.51<br>5.92<br>6.48<br>5.99                                                         | 4-7<br>4-7<br>6-11<br>6-11<br>4-7                                                         | -2.16<br>B<br>CRP<br>B<br>B                                                 | SH2 and SH3 domains. Multi-functional tyrosine kinase. Activated by GPCRs and TKRs.                                   |
| p21-Rac1<br><br>Or<br>p21-Rac2                                                                         | P6300<br><br>Or<br>P15153  | 21965                                                                                                    | 7.36                                                                                         | 6-11                                                                                      | B                                                                           | Plasma membrane-associated small GTPase.                                                                              |
| Annexin VII                                                                                            | P20073                     | 44532                                                                                                    | 5.99                                                                                         | 4-7                                                                                       | B                                                                           | Calcium/phospholipid-binding protein.                                                                                 |
| GRB2 adapter protein                                                                                   | P29354                     | 27564                                                                                                    | 5.46                                                                                         | 4-7                                                                                       | CRP                                                                         | Associates with tyrosine-phosphorylated proteins in the GPVI signaling cascade. Contains one SH2 and two SH3 domains. |
| RKIP [Raf kinase inhibitor protein]                                                                    | P30086                     | 21965                                                                                                    | 7.36                                                                                         | 6-11                                                                                      | B                                                                           | Regulates Raf-1.                                                                                                      |

|                                                        |        |                         |                      |                    |                |                                                                                                                                                                  |
|--------------------------------------------------------|--------|-------------------------|----------------------|--------------------|----------------|------------------------------------------------------------------------------------------------------------------------------------------------------------------|
| Crk-like protein                                       | P46109 | 39222                   | 5.84                 | 4-7                | CRP            | Interacts with DOCK2. Contains one SH2 and two SH3 domains.                                                                                                      |
| Rho GDP-dissociation inhibitor 2                       | P52566 | 16967                   | 5.77                 | 4-7                | -2.2           | Regulates the GDP/GTP exchange reaction of the Rho proteins.                                                                                                     |
| Adenylyl cyclase-associated protein 1 (CAP1)           | Q01518 | 53924<br>20756<br>18706 | 7.07<br>5.95<br>5.91 | 6-11<br>4-7<br>4-7 | 2.38<br>B<br>B | Adapter involved in Ras/cAMP-dependent signal transduction.                                                                                                      |
| MEK1                                                   | Q02750 | 44352                   | 5.99                 | 4-7                | B              | Activates ERK1 and ERK2 MAP kinases.                                                                                                                             |
| Integrin-linked protein kinase 1 (ILK-1)               | Q13418 | 49710                   | 7.22                 | 6-11               | 2.54           | Receptor-proximal protein kinase regulating integrin-mediated signal transduction                                                                                |
| Ras suppressor protein 1                               | Q15404 | 27474                   | 7.22                 | 6-11               | CRP            | Inhibits Ras signaling                                                                                                                                           |
| p38 $\alpha$ MAP kinase                                | Q16539 | 39865                   | 5.41                 | 4-7                | B              | Serine-threonine kinase. Activated by GPCRs and TKRs in platelets: substrates include cPLA2.                                                                     |
| Osteoclast stimulating factor 1 <sup>e)</sup>          | Q92882 | 26798                   | 5.54                 | 4-7                | B              | Binds to c-Src. Contains one SH3 domain.                                                                                                                         |
| Rho GTPase activating protein 18 (MacGAP)              | Q96S64 | 93423                   | 5.95                 | 4-7                | B              | Rho GTPase-activating protein. Transduces signals from plasma-membrane receptors and controls cell adhesion, motility and shape by actin cytoskeleton formation. |
| Dok-1 [Downstream of tyrosine kinases-1] <sup>e)</sup> | Q99704 | 59479                   | 5.94                 | 4-7                | B              | Adapter downstream of tyrosine kinases. Constitutively tyrosine phosphorylated.                                                                                  |
| RGS18 [Regulator of G-protein signaling 18]            | Q9NS28 | 27681<br>27732          | 6.93<br>5.91         | 6-11<br>6-11       | B<br>CRP       | Inhibits signal transduction by increasing the GTPase                                                                                                            |

|                                                        |        |                                                         |                                              |                                        |                            |                                                                                                                                               |
|--------------------------------------------------------|--------|---------------------------------------------------------|----------------------------------------------|----------------------------------------|----------------------------|-----------------------------------------------------------------------------------------------------------------------------------------------|
|                                                        |        |                                                         |                                              |                                        |                            | activity of G protein alpha subunits.                                                                                                         |
| Drebrin F (HIP-55)                                     | Q9UJU6 | 30391<br>17844                                          | 5.79<br>5.29                                 | 4-7<br>4-7                             | B<br>B                     | Actin-binding adapter protein. Contains an N-terminal actin binding domain and SH3 domain.                                                    |
| <b>Cytoskeletal</b>                                    |        |                                                         |                                              |                                        |                            |                                                                                                                                               |
| Gelsolin precursor                                     | P06396 | 101861<br>101709                                        | 5.53<br>5.60                                 | 4-7<br>4-7                             | B<br>B                     | Actin capping protein.                                                                                                                        |
| Vinculin                                               | P18206 | 105481<br>103578                                        | 5.30<br>5.34                                 | 4-7<br>4-7                             | B<br>-3.08                 | Involved in the attachment of actin-based microfilaments to the plasma membrane.                                                              |
| Myosin regulatory light chain 2, nonsarcomeric         | P19105 | 19996<br>18925<br>18856                                 | 4.42<br>4.52<br>4.59                         | 4-7<br>4-7<br>4-7                      | CRP<br>CRP<br>2.17         | Plays an important role in cytoskeletal regulation.                                                                                           |
| Filamin A                                              | P21333 | 116946<br>103578<br>102951<br>101861<br>101709<br>99269 | 5.98<br>5.44<br>5.49<br>5.53<br>5.60<br>5.63 | 4-7<br>4-7<br>4-7<br>4-7<br>4-7<br>4-7 | B<br>B<br>B<br>B<br>B<br>B | Anchors various transmembrane proteins to the actin cytoskeleton and serves as a scaffold for a wide range of cytoplasmic signaling proteins. |
| Cofilin, non-muscle isoform                            | P23528 | 18099                                                   | 7.60                                         | 6-11                                   | CRP                        | Control of actin polymerization.                                                                                                              |
| Myosin regulatory light chain 2, smooth muscle isoform | P24844 | 20667                                                   | 4.60                                         | 4-7                                    | 2.67                       | Plays an important role in cytoskeletal regulation.                                                                                           |
| Transgelin 2 (SM22-alpha homolog)                      | P37802 | 21965<br>21965<br>21864<br>18764                        | 7.36<br>7.43<br>7.69<br>5.44                 | 6-11<br>6-11<br>6-11<br>4-7            | B<br>B<br>3.09<br>B        | Actin-binding protein.                                                                                                                        |
| Coronin 1C                                             | Q9ULV4 | 57779                                                   | 6.61                                         | 6-11                                   | CRP                        | Actin-binding protein.                                                                                                                        |

|                                                            |        |        |      |      |       |                                                                                                                   |
|------------------------------------------------------------|--------|--------|------|------|-------|-------------------------------------------------------------------------------------------------------------------|
| A6 related protein                                         | Q9Y3F5 | 16806  | 5.54 | 4-7  | -2.72 | Control of actin polymerisation.                                                                                  |
| Talin 1                                                    | Q9Y490 | 223886 | 5.38 | 4-7  | B     | Involved in connections of major cytoskeletal structures to the plasma membrane. Binds to vinculin and integrins. |
|                                                            |        | 219847 | 5.40 | 4-7  | -3.13 |                                                                                                                   |
|                                                            |        | 40735  | 5.08 | 4-7  | B     |                                                                                                                   |
|                                                            |        | 37566  | 5.01 | 4-7  | -2.23 |                                                                                                                   |
| <b>Protein processing</b>                                  |        |        |      |      |       |                                                                                                                   |
| 26S proteasome non-ATPase regulatory subunit 11            | O00231 | 44352  | 5.99 | 4-7  | B     | Proteasome component.                                                                                             |
| Proteasome subunit alpha type 7                            | O14818 | 26137  | 8.44 | 6-11 | B     | Proteasome pathway.                                                                                               |
| Peptidyl-prolyl cis-trans isomerase A                      | P05092 | 17133  | 7.37 | 6-11 | 2.61  | Molecular Chaperone                                                                                               |
|                                                            |        | 16760  | 7.55 | 6-11 | -3.83 |                                                                                                                   |
| Proteasome subunit alpha type 4                            | P25789 | 27474  | 7.22 | 6-11 | CRP   | Proteasome pathway.                                                                                               |
| Ubiquitin-conjugating enzyme E2-25kDa                      | P27924 | 24851  | 5.07 | 4-7  | B     | Ubiquitin pathway.                                                                                                |
| Seryl-tRNA synthetase                                      | P49591 | 58176  | 5.88 | 4-7  | CRP   | Involved in protein biosynthesis.                                                                                 |
| Peptide methionine sulfoxide reductase <sup>e)</sup>       | Q9UJ68 | 24170  | 6.87 | 6-11 | B     | Has an important function as a repair enzyme for proteins that have been inactivated by oxidation.                |
| Ubiquitin-fold modifier conjugating enzyme 1 <sup>e)</sup> | Q9Y3C8 | 20245  | 6.57 | 4-7  | B     | Ubiquitin pathway.                                                                                                |
| <b>Metabolic enzymes</b>                                   |        |        |      |      |       |                                                                                                                   |
| L-lactate dehydrogenase A chain                            | P00338 | 32433  | 7.52 | 6-11 | CRP   | Anaerobic glycolysis.                                                                                             |
|                                                            |        | 32433  | 7.62 | 6-11 | CRP   |                                                                                                                   |
|                                                            |        | 31941  | 7.56 | 6-11 | CRP   |                                                                                                                   |
| Glyceraldehyde 3-phosphate dehydrogenase, liver            | P04406 | 35745  | 7.29 | 6-11 | CRP   | Second phase of glycolysis; first step.                                                                           |
|                                                            |        | 25620  | 7.30 | 6-11 | CRP   |                                                                                                                   |
| Glucose-6-phosphate 1-dehydrogenase                        | P11413 | 56094  | 6.51 | 4-7  | B     | Pentose phosphate pathway; first step.                                                                            |

|                                                       |                        |                           |                      |                   |             |                                                                                                             |
|-------------------------------------------------------|------------------------|---------------------------|----------------------|-------------------|-------------|-------------------------------------------------------------------------------------------------------------|
| Phosphoglucomutase                                    | P36871                 | 57779                     | 6.61                 | 6-11              | CRP         | Enzyme that participates in both the synthesis and break down of glucose.                                   |
| Fructosamine-3-kinase                                 | Q9H479                 | 35246                     | 6.87                 | 6-11              | B           | May initiate a process leading to the deglycation of fructoselysine and of glycosylated proteins.           |
| <b>Secreted</b>                                       |                        |                           |                      |                   |             |                                                                                                             |
| Coagulation factor XIII A chain precursor             | P00488                 | 101709<br>101861<br>99269 | 5.60<br>5.53<br>5.63 | 4-7<br>4-7<br>4-7 | B<br>B<br>B | Coagulation factor. Secreted by $\alpha$ -granules in platelets.                                            |
| TGF- $\beta$ 1 [Transforming growth factor $\beta$ 1] | P01137                 | 39865                     | 5.41                 | 4-7               | B           | Secreted protein that controls proliferation, and differentiation. Secreted by platelet $\alpha$ -granules. |
| Fibrinogen $\alpha/\alpha$ -E chain precursor         | P02671                 | 62215                     | 7.07                 | 6-11              | CRP         | Coagulation factor. Secreted by $\alpha$ -granules in platelets.                                            |
| Fibrinogen $\gamma$ chain precursor                   | P02679                 | 109393<br>108073          | 5.32<br>5.36         | 4-7<br>4-7        | -2.51<br>B  | Coagulation factor. Secreted by $\alpha$ -granules in platelets.                                            |
| Thrombospondin 1 (precursor)                          | P07996                 | 31435                     | 5.38                 | 4-7               | B           | Adhesive glycoprotein. Secreted by platelet $\alpha$ -granules.                                             |
| <b>Vesicle trafficking</b>                            |                        |                           |                      |                   |             |                                                                                                             |
| Syntaxin 11                                           | O75558                 | 29896                     | 6.28                 | 6-11              | B           | Regulates protein transport between late endosomes and the trans-golgi network.                             |
| Rab-11A<br>Or<br>Rab-11B                              | P24410<br>Or<br>Q15907 | 20104                     | 5.37                 | 4-7               | B           | Small G protein implicated in vesicle trafficking.                                                          |

|                                                                                                     |                        |       |      |      |       |                                                                                                                      |
|-----------------------------------------------------------------------------------------------------|------------------------|-------|------|------|-------|----------------------------------------------------------------------------------------------------------------------|
| Vacuolar protein sorting factor 4A <sup>e)</sup><br>Or<br>Vacuolar sorting protein 4b <sup>e)</sup> | Q9UN37<br>Or<br>O75351 | 56027 | 6.20 | 4-7  | CRP   | Involved in intracellular protein transport.                                                                         |
| <b>Miscellaneous</b>                                                                                |                        |       |      |      |       |                                                                                                                      |
| N-acetylserotonin O-methyltransferase-like protein                                                  | O95671                 | 73329 | 5.64 | 4-7  | CRP   | Unknown. Potential methyltransferase activity.                                                                       |
| Glutathione peroxidase 1                                                                            | P07203                 | 24726 | 5.75 | 4-7  | -2.52 | Catalyses the reduction of hydroxyperoxides by glutathione.                                                          |
| Fumarate hydratase, mitochondrial precursor <sup>e)</sup>                                           | P07954                 | 45156 | 7.07 | 6-11 | CRP   | Tricarboxylic acid cycle. Mitochondrial                                                                              |
| Leukocyte elastase inhibitor                                                                        | P30740                 | 43874 | 5.77 | 4-7  | B     | Serine proteinase inhibitor.                                                                                         |
| GMP reductase 1 [Guanosine monophosphate reductase 1] <sup>e)</sup>                                 | P36959                 | 37696 | 6.79 | 6-11 | CRP   | Maintains the intracellular balance of A and G nucleotides.                                                          |
| Adenylate kinase isoenzyme 2, mitochondrial                                                         | P54819                 | 26819 | 7.51 | 6-11 | CRP   | ATP-AMP transphosphorylase. Essential for maintenance and cell growth. Mitochondrial.                                |
| Nucleosome assembly protein 1-like 1                                                                | P55209                 | 49880 | 4.50 | 4-7  | B     | Nuclear protein involved in cell proliferation.                                                                      |
| Peroxiredoxin 1                                                                                     | Q06830                 | 22627 | 8.15 | 6-11 | B     | Regulation of intracellular concentrations of H <sub>2</sub> O <sub>2</sub> .                                        |
| Multimerin 1 precursor                                                                              | Q13201                 | 26373 | 5.94 | 4-7  | B     | Carrier protein for platelet factor V/Va. May play a role in the storage and stabilization of factor V in platelets. |
| Dihydropyrimidinase related protein-2 <sup>e)</sup>                                                 | Q16555                 | 57324 | 5.43 | 4-7  | B     | Dihydropyrimidinase activity.                                                                                        |

|                                                                        |                        |                |              |            |            |                                                                               |
|------------------------------------------------------------------------|------------------------|----------------|--------------|------------|------------|-------------------------------------------------------------------------------|
| Unc-112 related protein 2                                              | Q86UX7                 | 37756<br>15221 | 5.62<br>5.96 | 4-7<br>4-7 | B<br>B     | Probably involved in cell adhesion. Contains one PH domain.                   |
| Breast cancer associated protein BRAP1<br>Or<br>Bridging integrator-2  | Q86VV0<br>Or<br>Q9UKN4 | 26373<br>25955 | 5.94<br>5.80 | 4-7<br>4-7 | B<br>B     | Implicated in cell survival and tumorigenesis.                                |
| Programmed cell death 6-interacting protein <sup>e)</sup>              | Q8WUM4                 | 89068          | 5.97         | 4-7        | B          | May play a role in the regulation of both apoptosis and cell proliferation.   |
| Mps one binder kinase activator-like 1B (Mob1A)<br>Or<br>Mob4A protein | Q9H3T5<br>Or<br>Q8IY23 | 26174<br>24449 | 5.63<br>5.97 | 4-7<br>4-7 | CRP<br>CRP | Possibly binds to a protein kinase involved in mitotic checkpoint regulation. |
| HSPC159 protein [Hematopoietic stem/progenitor cells 159 protein]      | Q9P005                 | 15361          | 5.45         | 4-7        | -2.95      | Galactoside-binding lectin.                                                   |

<sup>a)</sup>AN indicates SWISS-PROT accession number.

<sup>b)</sup>2D gel where the protein feature is present.

<sup>c)</sup>fold change (CRP versus basal), a negative value indicates that the feature is expressed to a higher extent in basal samples; B = Protein feature only present in basal gels, CRP = Feature only present in CRP gels.

<sup>d)</sup>function either known or predicted by homology via SwissProt and NCBI.

<sup>e)</sup>First time reported in platelets.
